# Supplementary material for: Antibacterial effect of copper nanoparticles produced in a Shewanella-supported non-external circuit bioelectrical system on bacterial plant pathogens
Source: Royal Society of Chemistry journal article supplement (doi:10.1039/d1ra08187j), 2022-01-01

Figure SI. The growth of *Xanthomonas axonopodis* (001), *Ralstonia solanacearum* (002), and *Bacillus subtilis* (BS) in the liquid medium supplemented with 200 ppm of copper ions (ION) or nanoparticles (NANO). DC mean negative control.

Figure SI.

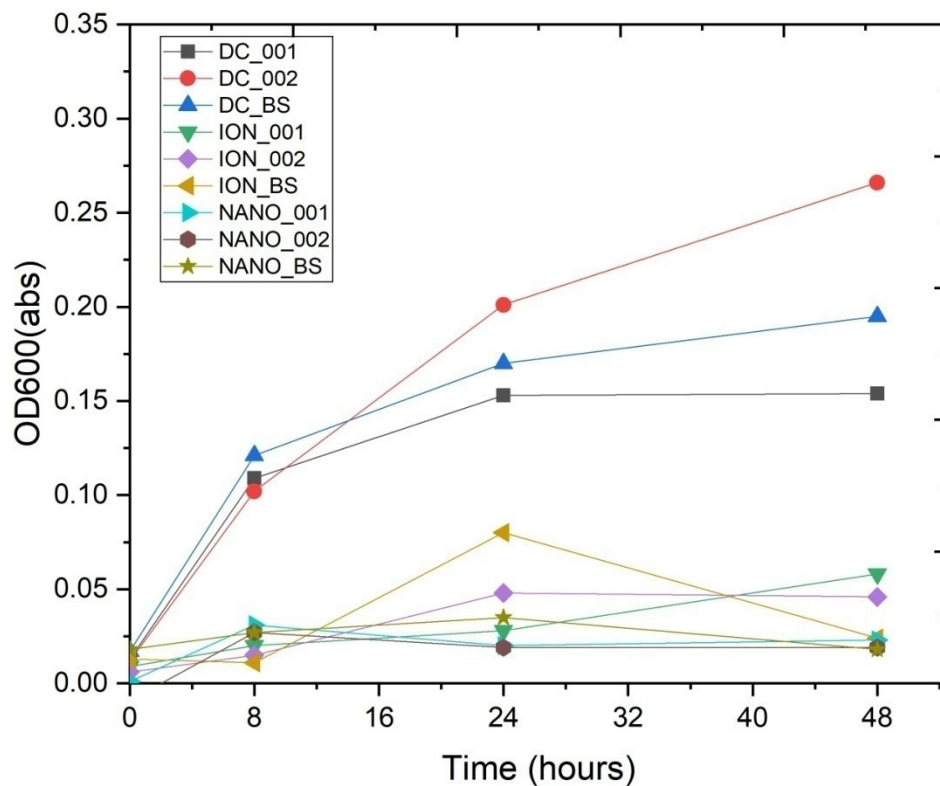

Supplement: d1ra08187j1.pdf [file d1ra08187j1.pdf]
